# Supplementary material for: An Update on “Insurance Coverage and Treatment Use Under the Affordable Care Act Among Adults With Mental and Substance Use Disorders”
Source: Atypon-hosted journal article supplement (doi:10.1176/appi.ps.201600566), 2017-02-27
Supplement: appi.ps.201600566.ds001.pdf [file appi.ps.201600566.ds001.pdf]

### Adjusted Insurance Coverage Trends by Mental Illness and Substance Use Disorder Diagnoses, 2011-2015

|                                                 | All Income Groups |               |           |             |                  | Income <200% FPL |              |           |             |                  |
|-------------------------------------------------|-------------------|---------------|-----------|-------------|------------------|------------------|--------------|-----------|-------------|------------------|
|                                                 | 2011-2013         |               | 2014-2015 |             | P-value for diff | 2011-2013        |              | 2014-2015 |             | P-value for diff |
|                                                 | %                 | 95% CI        | %         | 95% CI      |                  | %                | 95% CI       | %         | 95% CI      |                  |
| <b>Mental Illness</b>                           |                   |               |           |             |                  |                  |              |           |             |                  |
| Private insurance                               | 55.0              | 53.7% - 56.2% | 56.8      | 55.8%-57.8% | .02              | 25.8             | 24.3%-27.2%  | 30.1      | 28.7%-31.6% | <.01             |
| Medicaid                                        | 16.2              | 15.5%-16.9%   | 21.0      | 20.0%-22.0% | <.01             | 31.6             | 30.1%-33.1%  | 39.2      | 37.5%-41.0% | <.01             |
| Medicare/other                                  | 14.8              | 14.1%-15.6%   | 16.1      | 15.3%-17.0% | .02              | 19.7             | 18.4%-20.9%  | 21.6      | 20.5%-22.6% | .03              |
| Uninsured                                       | 21.3              | 20.5%-22.2%   | 14.5      | 13.7%-15.2% | <.01             | 33.2             | 31.6%-34.8%  | 21.2      | 19.8%-22.5% | <.01             |
| <b>Substance Use Disorder</b>                   |                   |               |           |             |                  |                  |              |           |             |                  |
| Private insurance                               | 56.9              | 55.5%-58.2%   | 58.2      | 56.8%-59.6% | .19              | 30.1             | 28.5%-31.8%  | 32.5      | 30.4%-34.7% | .08              |
| Medicaid                                        | 11.6              | 10.8%-12.4%   | 16.5      | 15.3%-17.6% | <.01             | 22.8             | 21.0%-24.6%  | 31.0      | 29.0%-32.9% | <.01             |
| Medicare/other                                  | 9.7               | 8.8%-10.6%    | 10.3      | 9.5%-11.2%  | .33              | 12.9             | 11.5%-14.4%  | 14.0      | 12.3%-15.7% | .35              |
| Uninsured                                       | 25.9              | 24.5%-27.3%   | 19.4      | 18.1%-20.7% | <.01             | 39.9             | 37.8%-42.0%  | 29.2      | 27.1%-31.4% | <.01             |
| <b>No Mental Illness/Substance Use Disorder</b> |                   |               |           |             |                  |                  |              |           |             |                  |
| Private insurance                               | 67.7              | 67.0%-68.4%   | 69.5      | 68.9%-70.1% | <.01             | 34.1             | 33.2%-35.0%  | 36.8      | 35.7%-38.0% | <.01             |
| Medicaid                                        | 9.1               | 8.8%-9.4%     | 12.2      | 11.8%-12.6% | <.01             | 22.1             | 21.2%-22.9%  | 29.2      | 28.3%-30.1% | <.01             |
| Medicare/other                                  | 8.5               | 8.2%-8.9%     | 9.2       | 8.9%-9.6%   | <.01             | 11.8             | 11.2%-12.5%  | 13.7      | 13.0%-14.3% | <.01             |
| Uninsured                                       | 18.6              | 18.2%-19.1%   | 13.3      | 13.0%-13.7% | <.01             | 37.6             | 36.7%, 38.5% | 26.9      | 26.0%-27.9% | <.01             |

**Notes:** All numbers are percentages. Nationally-representative estimate of adults age 18-64. P-value based on pairwise t-test of difference in means between 2011-2013 and 2014-2015.

**Adjusted Estimates of Service Use and Source of Payment for Mental Health and Substance Use Disorder Treatment among Adults with Mental Illness and Substance Use Disorders, 2011-2015**

|                                                                                       | All Income Groups |             |           |             |                  | Income <200% FPL |             |           |             |                  |
|---------------------------------------------------------------------------------------|-------------------|-------------|-----------|-------------|------------------|------------------|-------------|-----------|-------------|------------------|
|                                                                                       | 2011-2013         |             | 2014-2015 |             | P-value for diff | 2011-2013        |             | 2014-2015 |             | P-value for diff |
|                                                                                       | %                 | 95% CI      | %         | 95% CI      |                  | %                | 95% CI      | %         | 95% CI      |                  |
| <b>Mental Health Treatment (Mental Illness sample)</b>                                |                   |             |           |             |                  |                  |             |           |             |                  |
| Used Any Mental Health Treatment                                                      | 43.0              | 42.0%-43.9% | 43.9      | 42.8%-45.1% | .21              | 42.7             | 41.1%-44.2% | 42.4      | 40.7%-44.0% | .82              |
| Treatment Type Among Those in Mental Health Treatment                                 |                   |             |           |             |                  |                  |             |           |             |                  |
| Outpatient                                                                            | 57.2              | 55.6%-58.9% | 58.4      | 57.2%-59.6% | .26              | 58.0             | 55.8%-60.3% | 59.1      | 56.6%-61.6% | .54              |
| Residential                                                                           | 7.5               | 6.7%-8.4%   | 7.9       | 7.0%-8.8%   | .54              | 11.7             | 10.1%-13.3% | 12.0      | 10.5%-13.5% | .79              |
| Psychotropic Medications                                                              | 86.5              | 85.3%-87.7% | 85.7      | 84.4%-86.9% | .36              | 87.5             | 86.0%-89.1% | 86.5      | 84.6%-88.4% | .41              |
| Payment for Last Treatment Among Those Who Received Outpatient or Inpatient Treatment |                   |             |           |             |                  |                  |             |           |             |                  |
| Any Medicaid                                                                          | 14.8              | 13.4%-16.1% | 16.3      | 14.8%-17.7% | .16              | 29.6             | 27.0%-32.1% | 31.4      | 28.7%-34.1% | .33              |
| Any Private Insurance                                                                 | 34.2              | 32.1%-36.3% | 36.1      | 33.8%-38.3% | .23              | 15.2             | 13.2%-17.3% | 18.7      | 16.1%-21.2% | .04              |
| Any out of pocket                                                                     | 37.5              | 35.2%-39.7% | 37.4      | 35.6%-39.1% | .97              | 27.4             | 24.4%-30.4% | 24.8      | 22.8%-26.7% | .14              |
| Entirely out of pocket                                                                | 20.7              | 18.9%-22.4% | 19.0      | 17.3%-20.6% | .17              | 18.4             | 15.8%-21.1% | 14.3      | 12.2%-16.4% | .02              |
| Other sources                                                                         | 36.4              | 34.5%-38.3% | 36.0      | 34.2%-37.8% | .80              | 45.4             | 42.1%-48.7% | 47.6      | 44.7%-50.5% | .33              |
| <b>Substance Use Disorder Treatment (Substance Use Disorder Sample)</b>               |                   |             |           |             |                  |                  |             |           |             |                  |
| Used Any Substance Use Disorder Treatment                                             | 9.0               | 8.2%-9.8%   | 9.3       | 8.4%-10.3%  | .59              | 12.3             | 10.8%-13.8% | 12.3      | 10.7%-13.9% | .99              |
| Settings Among Those in Substance Use Disorder Treatment                              |                   |             |           |             |                  |                  |             |           |             |                  |
| Outpatient                                                                            | 49.0              | 44.9%-      | 53.4      | 48.9%-      | .17              | 55.1             | 49.9%-      | 58.7      | 52.4%-      | .38              |

|                            |      |                 |      |                 |     |      |                 |      |                 |     |
|----------------------------|------|-----------------|------|-----------------|-----|------|-----------------|------|-----------------|-----|
|                            |      | 53.1%           |      | 57.9%           |     |      | 60.2%           |      | 64.9%           |     |
| Residential                | 37.8 | 33.2%-<br>42.4% | 36.3 | 32.1%-<br>40.4% | .63 | 45.2 | 39.5%-<br>50.9% | 35.6 | 30.1%-<br>41.1% | .02 |
| Physician's Office         | 25.6 | 21.6%-<br>29.6% | 24.3 | 21.0%-<br>27.6% | .62 | 21.8 | 17.0%-<br>26.6% | 18.6 | 12.9%-<br>24.3% | .41 |
| Hospital/ER                | 41.0 | 36.2%-<br>45.9% | 36.1 | 32.2%-<br>40.0% | .12 | 43.5 | 38.4%-<br>48.6% | 37.4 | 31.8%-<br>43.0% | .12 |
| Mental Health Center       | 37.4 | 33.1%-<br>41.7% | 37.2 | 32.6%-<br>41.8% | .95 | 40.5 | 34.5%-<br>46.5% | 41.2 | 35.0%-<br>47.4% | .88 |
| Payment for Last Treatment |      |                 |      |                 |     |      |                 |      |                 |     |
| Any Medicaid               | 19.5 | 16.1%-<br>22.8% | 26.8 | 22.5%-<br>31.1% | .01 | 25.8 | 21.1%-<br>30.6% | 34.2 | 28.2%-<br>40.2% | .03 |
| Any Private Insurance      | 37.0 | 32.7%-<br>41.3% | 42.9 | 37.4%-<br>48.4% | .10 | 32.0 | 27.2%-<br>36.8% | 37.1 | 30.2%-<br>44.0% | .24 |
| Any out of pocket          | 54.3 | 49.2%-<br>59.4% | 52.6 | 47.0%-<br>58.3% | .67 | 47.8 | 41.1%-<br>54.4% | 43.8 | 36.0%-<br>51.6% | .45 |
| Entirely out of pocket     | 22.4 | 18.0%-<br>26.8% | 20.6 | 16.5%-<br>24.7% | .56 | 21.9 | 16.5%-<br>27.2% | 17.7 | 13.1%-<br>22.4% | .26 |
| Other sources              | 41.5 | 36.5%-<br>46.5% | 41.1 | 35.9%-<br>46.2% | .91 | 47.9 | 41.4%-<br>54.3% | 47.3 | 41.6%-<br>53.1% | .91 |

Table Notes: All numbers are percentages. Adjusted for age, sex, race/ethnicity, living in a metro area, and general health status
